# Supplementary material
Source: publisher figshare collection journal article supplement (https://tandf.figshare.com/ndownloader/files/15248795)
Supplement: Supplementary file 1 [file 15248795]

# Supplementary materials

## Results

## Serial mediation analyses of ACEs on probable behavioural addictions

The serial mediation pathway of increased emotion dysregulation and depression severity on probable gambling addiction was not significant. The indirect effects through depression severity was also not significant. However, the indirect effect though emotion dysregulation was significant, *b* = .10, *SE* = .03, 95% *CI* [.05, .17].

Emotion dysregulation and depression severity serially mediate the link between childhood adversity and probable food addiction, *b* = .09, *SE* = .03, 95% *CI* [.04, .14]. There was also a significant and unique indirect effect though emotion dysregulation, *b* = .06, *SE* = .03, 95% *CI* [.01, .13], and depression severity, *b* = .19, *SE* = .04, 95% *CI* [.12, .27].

The serial mediation of emotion dysregulation and depression severity on probable social media addiction was not significant. The indirect effects through depression severity was also not significant. However, the indirect effect though emotion dysregulation was significant, *b* = .09, *SE* = .03, 95% *CI* [.04, .16].
